# Supplementary material
Source: PubMed Central journal article supplement (PMC2347398)
Supplement: jbacter_190_9_3283__2.pdf [file jbacter_190_9_3283__2.pdf]

**A**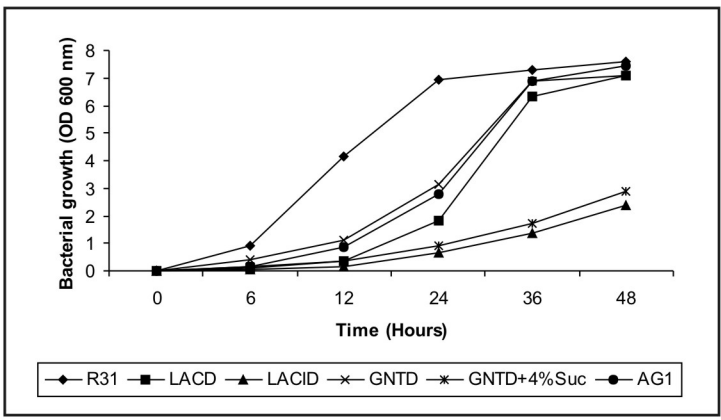

| OD  | R31               | LACD              | LACID             | GNTD              | GNTD + 4%Suc      | AG1               |
|-----|-------------------|-------------------|-------------------|-------------------|-------------------|-------------------|
| 1.4 | $2.1 \times 10^8$ | $7.3 \times 10^7$ | $1.9 \times 10^7$ | $8.5 \times 10^7$ | $3 \times 10^7$   | $5.6 \times 10^7$ |
| 3.0 | $4.4 \times 10^8$ | $9.7 \times 10^7$ | $5.3 \times 10^7$ | $1.6 \times 10^8$ | $6.9 \times 10^7$ | $8.8 \times 10^7$ |
| 6.1 | $7.2 \times 10^8$ | $2.5 \times 10^8$ | ND                | $3.5 \times 10^8$ | ND                | $2.9 \times 10^8$ |

**B**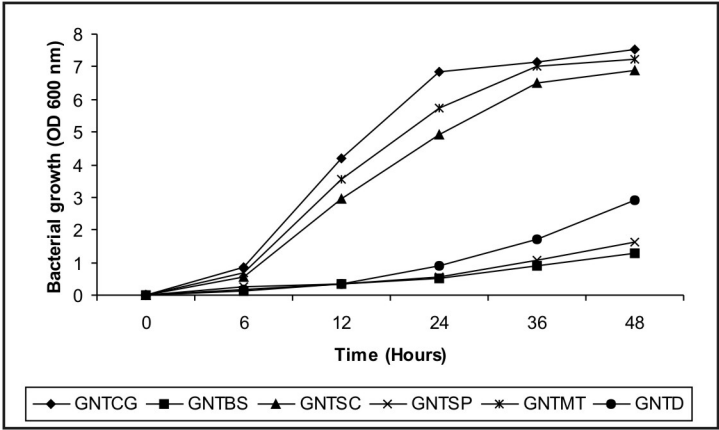

| OD  | GNTCG             | GNTBS             | GNTSC             | GNTSP           | GNTMT             | GNTD              |
|-----|-------------------|-------------------|-------------------|-----------------|-------------------|-------------------|
| 1.4 | $2.2 \times 10^8$ | $1.2 \times 10^7$ | $1.5 \times 10^8$ | $9 \times 10^6$ | $2 \times 10^8$   | $3 \times 10^7$   |
| 3.0 | $4.3 \times 10^8$ | ND                | $3.7 \times 10^8$ | ND              | $4.1 \times 10^8$ | $6.9 \times 10^7$ |
| 6.1 | $7 \times 10^8$   | ND                | $6.9 \times 10^8$ | ND              | $6.2 \times 10^8$ | ND                |

**C**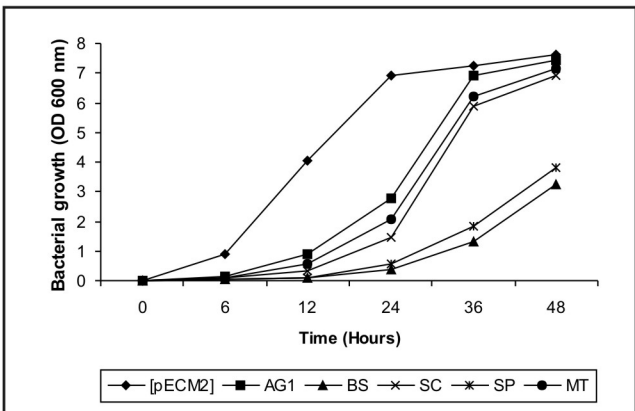

| OD  | [pECM2]           | AG1               | BS                | SC                | SP                | MT                |
|-----|-------------------|-------------------|-------------------|-------------------|-------------------|-------------------|
| 1.4 | $1.9 \times 10^8$ | $5.6 \times 10^7$ | $1.1 \times 10^8$ | $1.4 \times 10^8$ | $7.1 \times 10^7$ | $6.6 \times 10^7$ |
| 3.0 | $4.6 \times 10^8$ | $8.8 \times 10^7$ | $3.4 \times 10^8$ | $4.1 \times 10^8$ | $9.6 \times 10^7$ | $1.5 \times 10^8$ |
| 6.1 | $7.1 \times 10^8$ | $2.9 \times 10^8$ | ND                | $6.7 \times 10^8$ | ND                | $3.9 \times 10^8$ |
