# Supplementary material
Source: PubMed Central journal article supplement (PMC2347398)

**A**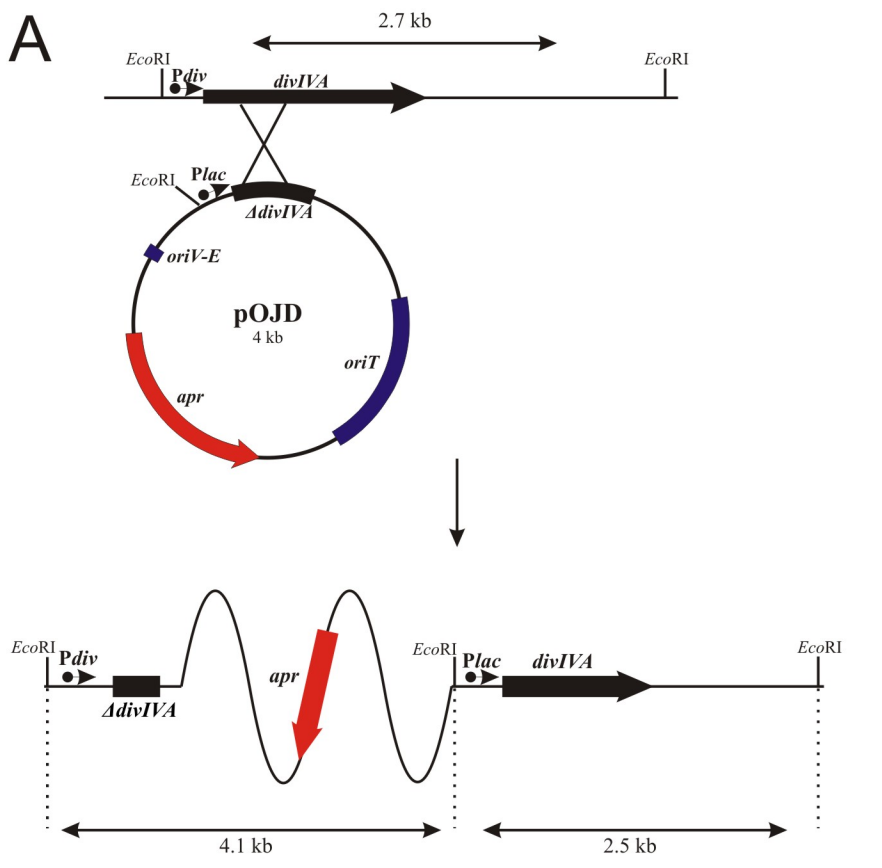**B**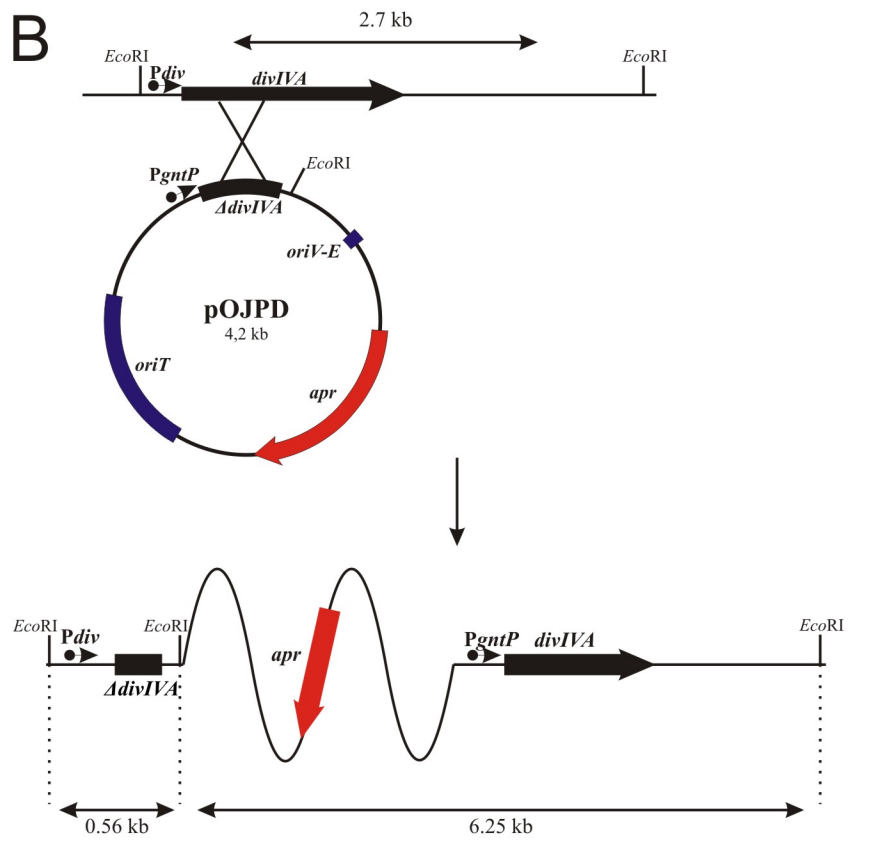**C**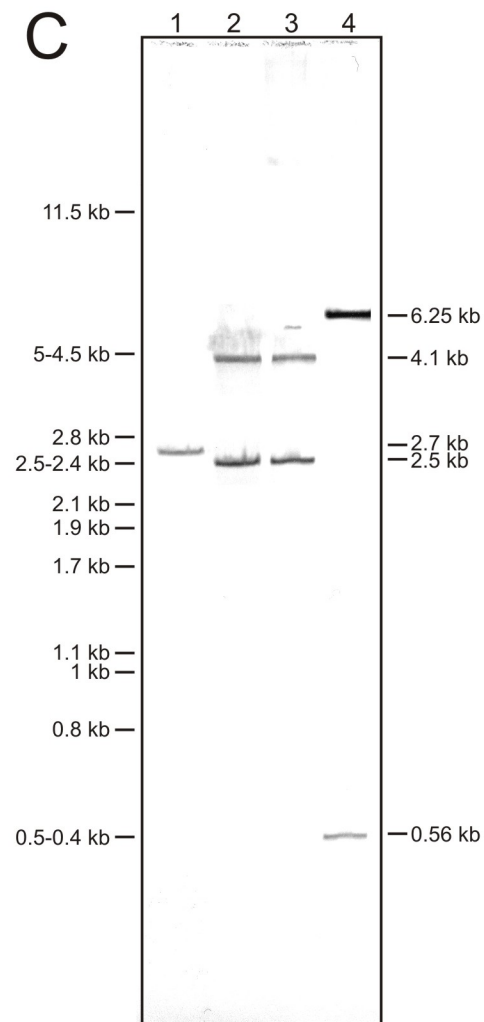

Supplement: jbacter_190_9_3283__1.pdf [file jbacter_190_9_3283__1.pdf]

**A**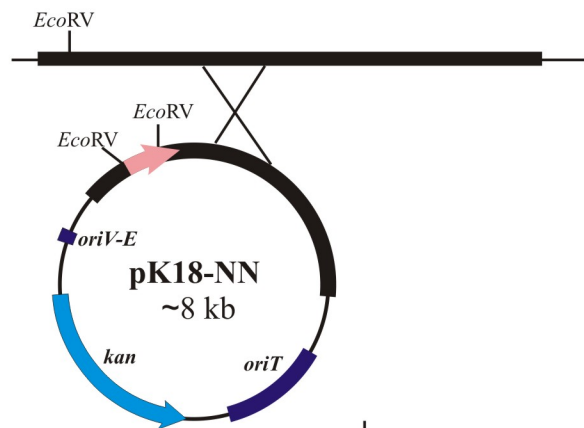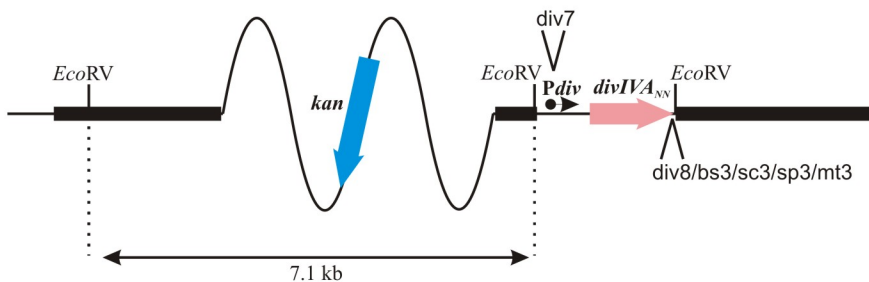**B**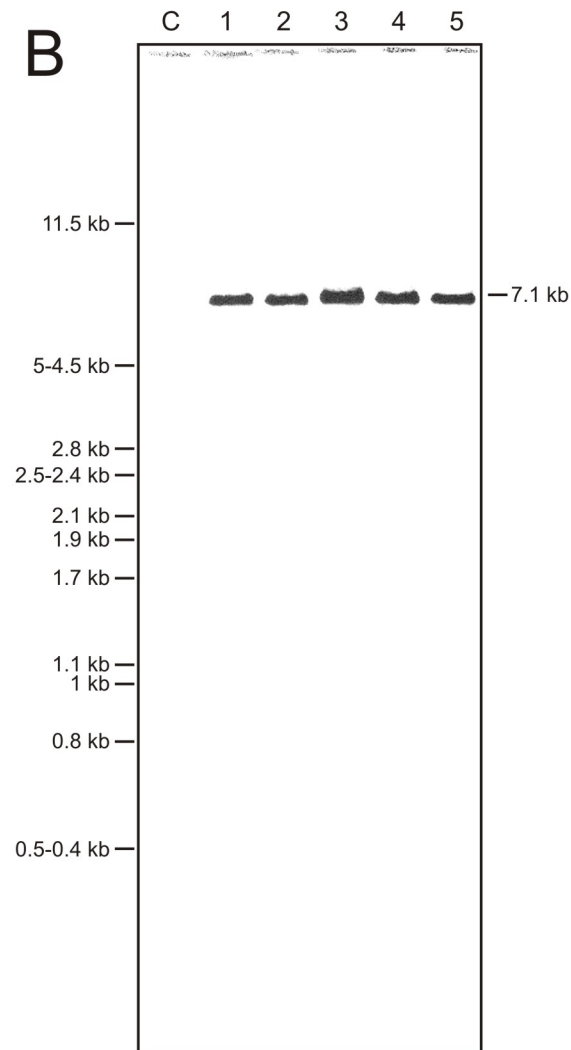**C**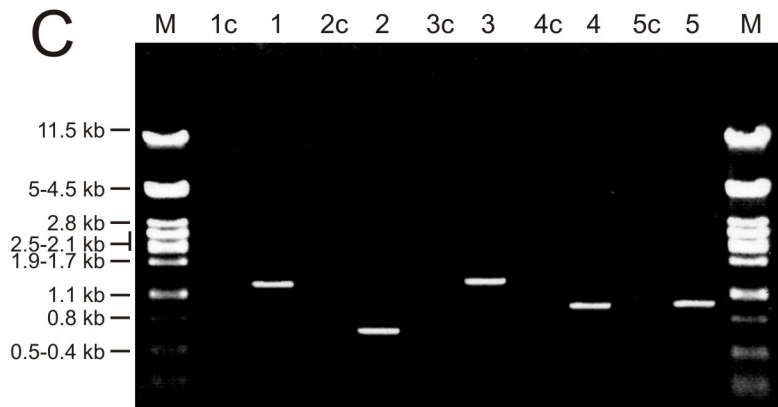**D**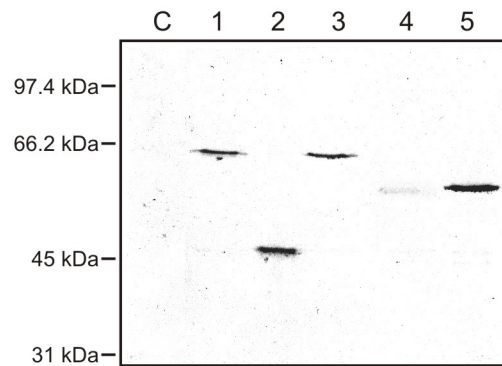

Supplement: jbacter_190_9_3283__3.pdf [file jbacter_190_9_3283__3.pdf]
